# Supplementary material
Source: Springer Nature journal article supplement (https://www.springermedizin.de/resource/supplementary/12981_2012_266_MOESM1_ESM.pdf/9603534)

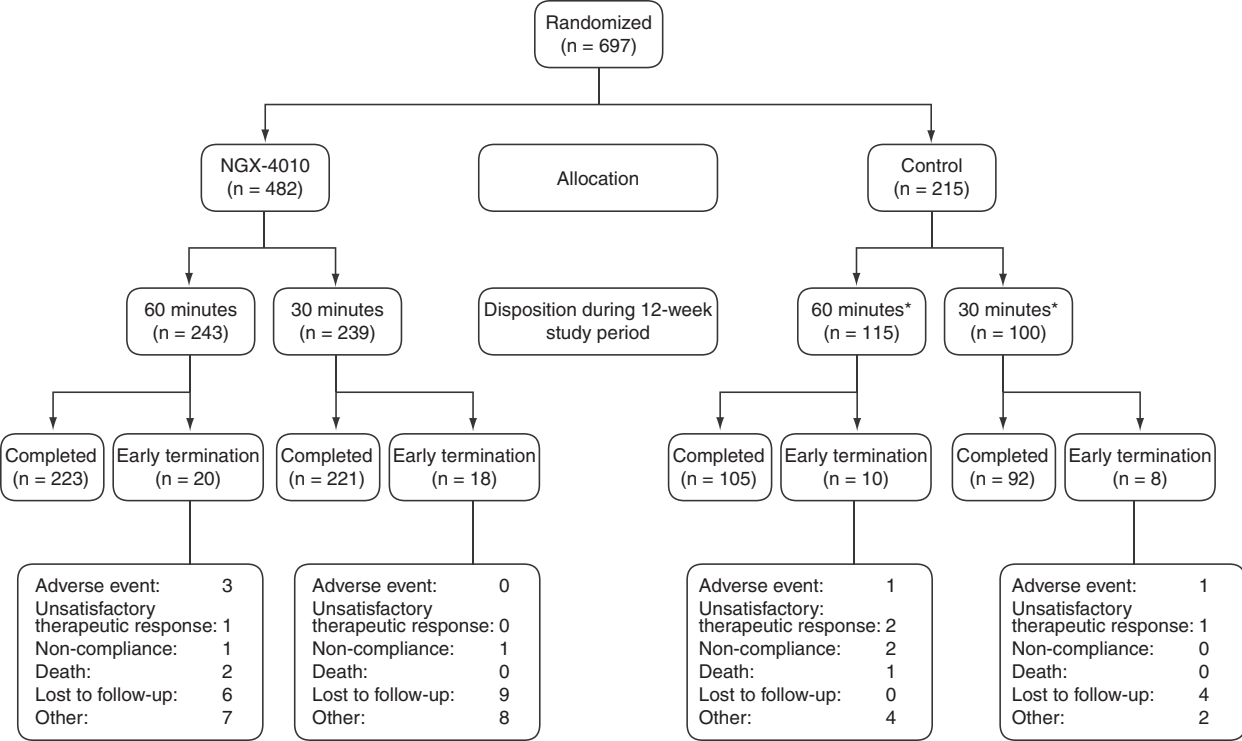

Supplement: MOESM1 [file 9603534]
